# Supplementary material
Source: publisher figshare collection journal article supplement (https://tandf.figshare.com/articles/dataset/_/1568189)
Supplement: Supplementary file 1 [file 3]

An occurrence of fossil eggs from the Mesozoic of Madagascar and a detailed  
observation of eggshell microstructure

DANIEL R. LAWVER,<sup>\*,1</sup> ARMAND H. RASOAMIARAMANANA,<sup>2</sup> and INGMAR  
WERNEBURG<sup>3,4</sup>

<sup>1</sup>Department of Earth Sciences, Montana State University, Bozeman, Montana 59717  
U.S.A., danlawver@gmail.com;

<sup>2</sup>Département de Paléontologie, Université d' Antananarivo, Antananarivo (101),  
Madagascar, armandras@yahoo.fr;

<sup>3</sup>Paläontologisches Institut und Museum der Universität Zürich, Karl Schmid Strasse 4,  
8006 Zürich, Switzerland, i.werneburg@gmail.com;

<sup>4</sup>Museum für Naturkunde, Leibniz Institut für Evolutions und Biodiversitätsforschung an  
der Humboldt, Universität zu Berlin, Invalidenstraße 43, 10115 Berlin, Germany

\*Corresponding author.

## INTRODUCTION

The following file is a video of computed tomographic (CT) data of a Late Cretaceous (Campanian) turtle egg (PIMUZ lab#2012.IW30) from the Morondava basin, Madagascar.

## METHODS

CT scans were performed with a GE Phoenix v | tome | x CT-scanner at the Anthropologisches Institut der Universität Tübingen, Germany with a resolution of 50  $\mu\text{m}$ .

## RESULTS

No evidence of embryonic remains are found inside the egg, suggesting that the eggs were either infertile or termination of embryonic development occurred prior to ossification of the skeleton.
